# Supplementary material
Source: PubMed Central journal article supplement (PMC10592632)
Supplement: NIHMS1904767-supplement-supinfo.pdf [file NIHMS1904767-supplement-supinfo.pdf]

## Supplemental Material

### Supplementary Table S1: Results from Independent Samples T-Tests comparing covariates between inconsistent hearing aid users and hearing aid non-users.

The two groups did not significantly differ by any collected covariate metric.

|                               | <b>t</b>         | <b>df</b> | <b>p</b> |
|-------------------------------|------------------|-----------|----------|
| Age                           | -1.479           | 30.647    | 0.149    |
| Sex                           | -0.377           | 31.516    | 0.709    |
| Race                          | -0.802           | 25.134    | 0.430    |
| Hearing loss severity         | -1.291           | 24.093    | 0.209    |
| Hearing loss asymmetry        | -0.830           | 22.850    | 0.415    |
| Hearing loss duration (years) | -1.152           | 26.829    | 0.260    |
| ARS                           | 1.466            | 42.054    | 0.150    |
| Glasses                       | -0.601           | 33.904    | 0.552    |
| Diabetes                      | 0.304            | 29.067    | 0.763    |
| Stroke                        | N/a <sup>a</sup> |           |          |
| Cognitive decline             | -1.273           | 20.023    | 0.218    |
| Previous falls                | -1.098           | 21.043    | 0.285    |

*Note.* Welch's t-test.

<sup>a</sup> No inconsistent HA users experienced a stroke.

**Supplementary Table S2: Logistic Regression Model output for odds of falling in inconsistent hearing aid users compared to consistent hearing aid users (reference).**

|                 | Estimate | Robust Standard Error | Odds Ratio | z      | Wald Test      |    |              | 95% Confidence interval (odds ratio scale) |             |
|-----------------|----------|-----------------------|------------|--------|----------------|----|--------------|--------------------------------------------|-------------|
|                 |          |                       |            |        | Wald Statistic | df | p            | Lower bound                                | Upper bound |
| (Intercept)     | 0.802    | 2.059                 | 2.229      | 0.389  | 0.157          | 1  | 0.697        | 0.039                                      | 126.210     |
| Incons. HA user | 1.297    | 0.524                 | 3.658      | 2.475  | 6.547          | 1  | <b>0.013</b> | 1.310                                      | 10.213      |
| Sex             | -0.102   | 0.366                 | 0.903      | -0.278 | 0.078          | 1  | 0.781        | 0.441                                      | 1.850       |
| Age             | -0.036   | 0.029                 | 0.965      | -1.246 | 1.628          | 1  | 0.213        | 0.912                                      | 1.021       |
| HL severity     | 0.011    | 0.012                 | 1.011      | 0.929  | 0.851          | 1  | 0.353        | 0.988                                      | 1.034       |
| ARS             | 0.127    | 0.098                 | 1.135      | 1.288  | 1.500          | 1  | 0.198        | 0.936                                      | 1.376       |

**Supplementary Table S3: Logistic Regression Model for odds of being at risk for falls in inconsistent hearing aid users compared to consistent hearing aid users (reference).**

|                 | Estimate | Robust Standard Error | Odds Ratio | z      | Wald Test      |    |       | 95% Confidence interval (odds ratio scale) |             |
|-----------------|----------|-----------------------|------------|--------|----------------|----|-------|--------------------------------------------|-------------|
|                 |          |                       |            |        | Wald Statistic | df | p     | Lower bound                                | Upper bound |
| (Intercept)     | -1.860   | 2.110                 | 0.156      | -0.881 | 0.879          | 1  | 0.378 | 0.002                                      | 9.746       |
| Incons. HA user | 0.923    | 0.507                 | 2.516      | 1.821  | 3.286          | 1  | 0.069 | 0.932                                      | 6.790       |
| Sex             | -0.101   | 0.354                 | 0.904      | -0.286 | 0.082          | 1  | 0.775 | 0.451                                      | 1.810       |
| Age             | -0.001   | 0.029                 | 0.999      | -0.036 | 0.001          | 1  | 0.971 | 0.945                                      | 1.057       |
| HL severity     | 0.014    | 0.011                 | 1.014      | 1.256  | 1.474          | 1  | 0.209 | 0.992                                      | 1.036       |
| ARS             | 0.232    | 0.102                 | 1.262      | 2.276  | 5.276          | 1  | 0.023 | 1.033                                      | 1.541       |
